# Supplementary material
Source: PubMed Central journal article supplement (PMC3122870)

Figure S1

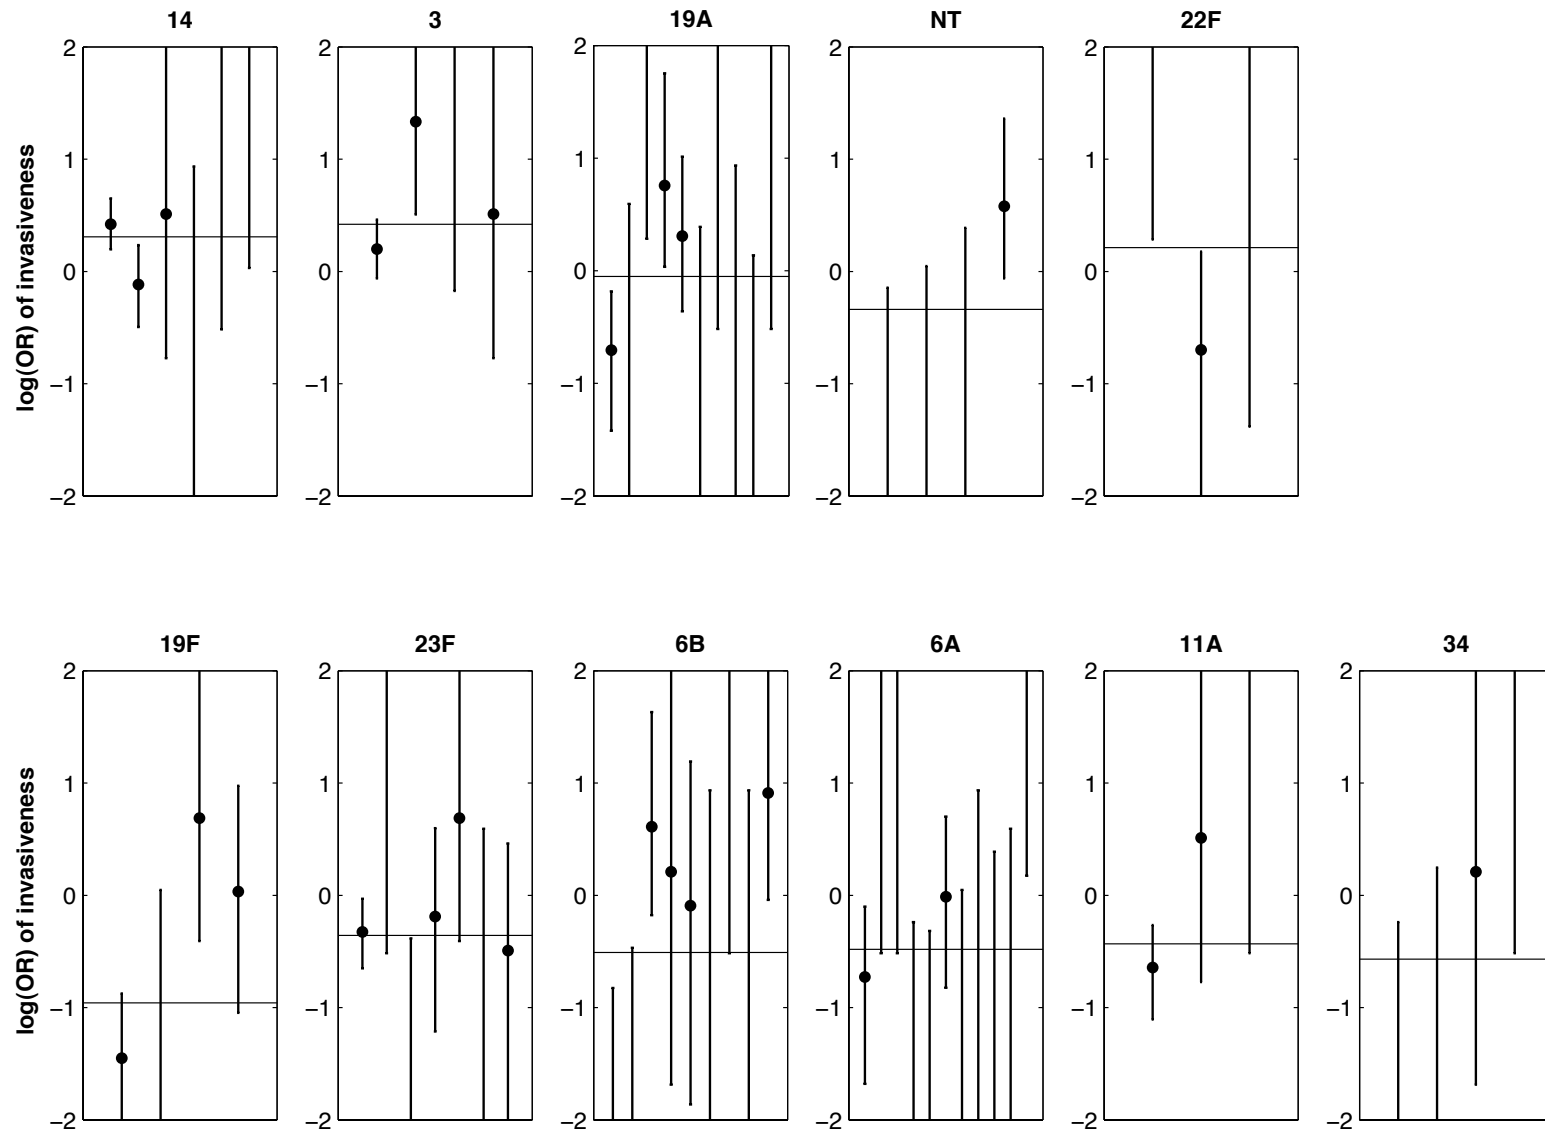

Supplement: supp_49_4_1369__1.pdf [file supp_49_4_1369__1.pdf]
