# Supplementary material
Source: PubMed Central journal article supplement (PMC3122870)
Supplement: supp_49_4_1369__2.pdf [file supp_49_4_1369__2.pdf]

**Table S1. Capsular types and clones recovered from invasive disease and carriage between 2001 and 2003 in Portugal**

| Serotype        | No. of isolates  |          | Total no. of isolates | OR (CI <sub>95%</sub> ) <sup>a</sup> | No. of PFGE clusters | Most common clones <sup>b</sup> (n)                                                    | Fisher exact test p-value (heterogeneity of invasive potential) <sup>c</sup> |
|-----------------|------------------|----------|-----------------------|--------------------------------------|----------------------|----------------------------------------------------------------------------------------|------------------------------------------------------------------------------|
|                 | Invasive disease | Carriage |                       |                                      |                      |                                                                                        |                                                                              |
| 14              | 61               | 52       | 113                   | <b>2.03 (1.35-3.06)</b>              | 9                    | 14-1 [ST156+ST790] (72), 14-2 [ST15+ST409] (31)                                        | 0.003*                                                                       |
| 19F             | 7                | 93       | 100                   | <b>0.11 (0.04-0.24)</b>              | 8                    | 19F-1 [ST177+ST179] (84)                                                               | <0.001*                                                                      |
| 23F             | 20               | 70       | 90                    | <b>0.44 (0.25-0.74)</b>              | 12                   | 23F-1 [ST338+ST732] (52), 23F-3 [ST33] (16)                                            | 0.003*                                                                       |
| 6B              | 14               | 69       | 83                    | <b>0.31 (0.16-0.56)</b>              | 15                   | 6B-1 [ST887] (40), 6B-2 [ST176] (19)                                                   | <0.001*                                                                      |
| 6A              | 14               | 64       | 78                    | <b>0.33 (0.17-0.61)</b>              | 19                   | 6A-1 [ST460+ST1880] (19), 6A-2 [ST1879] (12), 6A-3 [ST1878] (14)                       | <0.001*                                                                      |
| 3               | 43               | 28       | 71                    | <b>2.63 (1.57-4.47)</b>              | 6                    | 3-1 [ST180+ST232] (51), 3-2 [ST162+ST1220+ST1646] (14)                                 | 0.004*                                                                       |
| 19A             | 25               | 45       | 70                    | 0.89 (0.52-1.51)                     | 11                   | 19A-1 [ST81+ST634+ST994] (27), 19A-4 [ST193+ST202+ST416] (9), 19A-5 [ST416+ST1151] (9) | <0.001*                                                                      |
| 11A             | 10               | 42       | 52                    | <b>0.37 (0.16-0.76)</b>              | 4                    | 11A-1 [ST62+ST408] (47)                                                                | 0.004*                                                                       |
| 1               | 44               | 1        | 45                    | <b>78.09 (13.22-3115.57)</b>         | 2                    | 1-1 [ST228+ST306] (31), 1-2 (14) [ST304+ST350]                                         | 1.000                                                                        |
| 35F             | 3                | 35       | 38                    | <b>0.13 (0.03-0.43)</b>              | 3                    | 35F-1 [ST1368] (22), 35F-2 (15) [ST446]                                                | 0.040                                                                        |
| 16F             | 1                | 36       | 37                    | <b>0.04 (0.00-0.26)</b>              | 3                    | 16F-1 [ST30] (34)                                                                      | 0.027                                                                        |
| 4               | 32               | 4        | 36                    | <b>13.78 (4.84-54.02)</b>            | 6                    | 4-1 [ST1221] (18), 4-2 (10) [ST247]                                                    | 0.530                                                                        |
| 15B/C           | 2                | 33       | 35                    | <b>0.09 (0.01-0.37)</b>              | 1                    | 15B/C-1 [ST411] (34)                                                                   | 1.000                                                                        |
| 18C             | 18               | 13       | 31                    | <b>2.29 (1.05-5.13)</b>              | 9                    | 18C-1 [ST1233+ST1381] (11)                                                             | 0.083                                                                        |
| NT <sup>d</sup> | 7                | 24       | 31                    | 0.46 (0.17-1.12)                     | 13                   | NT-1 [ST344] (10)                                                                      | <0.001*                                                                      |
| 9V              | 16               | 14       | 30                    | 1.88 (0.85-4.20)                     | 2                    | 9V-1 [ST156+ST162+ST557+ST838] (29)                                                    | 1.000                                                                        |
| 8               | 27               | 1        | 28                    | <b>46.17 (7.55-1878.37)</b>          | 3                    | 8-1 [ST53+ST327] (22)                                                                  | 1.000                                                                        |
| 10A             | 9                | 19       | 28                    | 0.76 (0.30-1.78)                     | 3                    | 10A-1 [ST97+ST1226] (26)                                                               | 0.095                                                                        |
| 7F              | 21               | 3        | 24                    | <b>11.78 (3.49-62.06)</b>            | 1                    | 7F-1 [ST191] (24)                                                                      | 1.000                                                                        |

|                    |     |     |      |                           |   |                                           |        |
|--------------------|-----|-----|------|---------------------------|---|-------------------------------------------|--------|
| 34                 | 3   | 18  | 21   | <b>0.27 (0.05-0.92)</b>   | 5 | 34-1 [ST2001] (12)                        | 0.003* |
| 6C                 | 4   | 14  | 18   | 0.46 (0.11-1.47)          | 3 | 6C-1 [ST1150] (7), 6C-2 [ST395] (6)       | 0.114  |
| 22F                | 8   | 8   | 16   | 1.63 (0.53-5.01)          | 3 | 22F-1 [ST443] (6), 22F-2 [ST433] (8)      | 0.001* |
| 18A                | 4   | 12  | 16   | 0.54 (0.13-1.78)          | 4 | 18A-1 [ST241] (8)                         | 0.021  |
| 23B                | 3   | 11  | 14   | 0.44 (0.08-1.67)          | 2 | 23B-1 [ST439] (13)                        | 1.000  |
| 5                  | 12  | 0   | 12   | <b>Inf (4.58-Inf)</b>     | 1 | 5-1 [ST1223] (12)                         | 1.000  |
| 23A                | 1   | 11  | 12   | 0.15 (0.00-1.01)          | 3 | 23A-1 [ST2404] (8)                        | 1.000  |
| 20                 | 10  | 0   | 10   | <b>Inf (3.68-Inf)</b>     | 5 | 20-1 [ST235] (4)                          | 1.000  |
| 12B                | 10  | 0   | 10   | <b>Inf (3.68-Inf)</b>     | 3 | 12B-1 [ST218] (5)                         | 1.000  |
| 31                 | 3   | 7   | 10   | 0.69 (0.11-3.05)          | 3 | 31-1 [ST1766+ST2002] (8)                  | 1.000  |
| 24F                | 6   | 3   | 9    | 3.26 (0.69-20.24)         | 4 | 24F-1 [ST72](3), 24F-3 (3) [ST230+ST1708] | 0.786  |
| 33F                | 5   | 4   | 9    | 2.03 (0.43-10.29)         | 1 | 33F-1 [ST1655] (9)                        | 1.000  |
| 37                 | 0   | 9   | 9    | <b>0.00 (0.00-0.81)</b>   | 1 | 37-1 [ST447] (9)                          | 1.000  |
| 9N                 | 6   | 1   | 7    | <b>9.80 (1.18-451.08)</b> | 2 | 9N-1 [ST66] (6)                           | 0.143  |
| 9L                 | 6   | 0   | 6    | <b>Inf (1.92-Inf)</b>     | 2 | 9L-1 [ST1654] (6)                         | 1.000  |
| 15A                | 2   | 4   | 6    | 0.81 (0.07-5.67)          | 1 | 15A-1 [ST63+ST2108] (6)                   | 1.000  |
| 21                 | 0   | 6   | 6    | 0.00 (0.00-1.37)          | 2 | 21-1 [ST1877] (4)                         | 1.000  |
| Other <sup>e</sup> | 18  | 15  | 33   |                           |   |                                           |        |
| Total              | 475 | 769 | 1244 |                           |   |                                           |        |

<sup>a</sup> OR and CI<sub>95%</sub> are shown for serotypes that had at least five isolates. Highlighted in bold are OR estimates whose confidence interval does not include one. Inf, infinite.

<sup>b</sup> Clones defined as described in Materials and Methods. Numbers in parenthesis indicate the number of isolates found in each clone.

<sup>c</sup> Evidence for heterogeneity of invasive disease potential of clones sharing the same serotype is indicated by significant p-values after FDR correction marked by asterisks.

<sup>d</sup> NT – non-typable

<sup>e</sup> Other serotypes: 15F, 29, 39, and 42 found only in carriage; 7C, 10F, 13, 19C, 24B, 25F, and 35B found only in invasive disease; 9A, 17F, and 38 found in both.
